# Supplementary material for: Disordered medium-pore zeolite PST-24 as an efficient low-temperature isobutanol dehydration catalyst
Source: Royal Society of Chemistry journal article supplement (doi:10.1039/d4cy00063c), 2024-01-01
Supplement: d4cy00063c1.pdf [file d4cy00063c1.pdf]

## Supplementary Information

### Disordered medium-pore zeolite PST-24 as an efficient low-temperature isobutanol dehydration catalyst

Jeong Hwan Lee,<sup>†a</sup> Donghui Jo<sup>b</sup> and Suk Bong Hong<sup>\*a</sup>

<sup>a</sup> *Center for Ordered Nanoporous Materials Synthesis, Division of Environmental Science and Engineering, POSTECH, Pohang 37673, Korea*

<sup>b</sup> *Low-Carbon Petrochemical Research Center, Korea Research Institute of Chemical Technology (KRICT), Daejeon 34114, Korea*

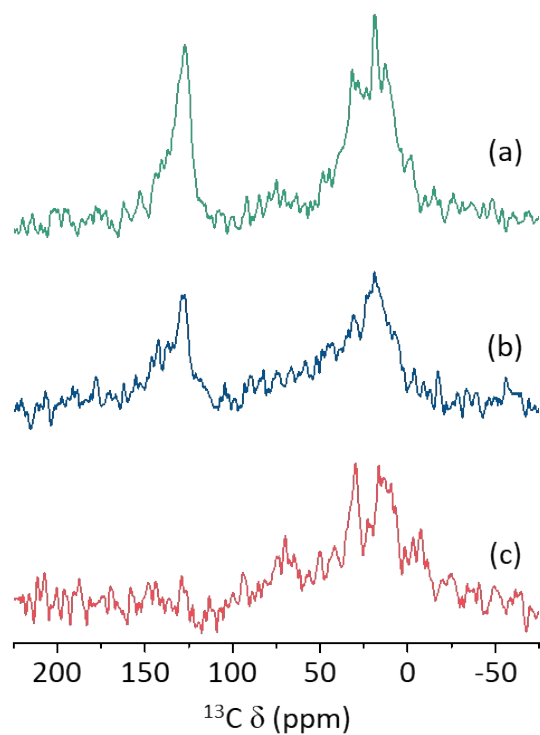

**Fig. S1**  $^1\text{H}$ - $^{13}\text{C}$  CP MAS NMR spectra of (a) H-ZSM-5(50), (b) H-ferrierite(33) and (c) H-PST-24(47) after isobutanol dehydration at 250 °C and 24.8 h<sup>-1</sup> isobutanol WHSV with feed stream containing 9% H<sub>2</sub>O vapor for 30 h.

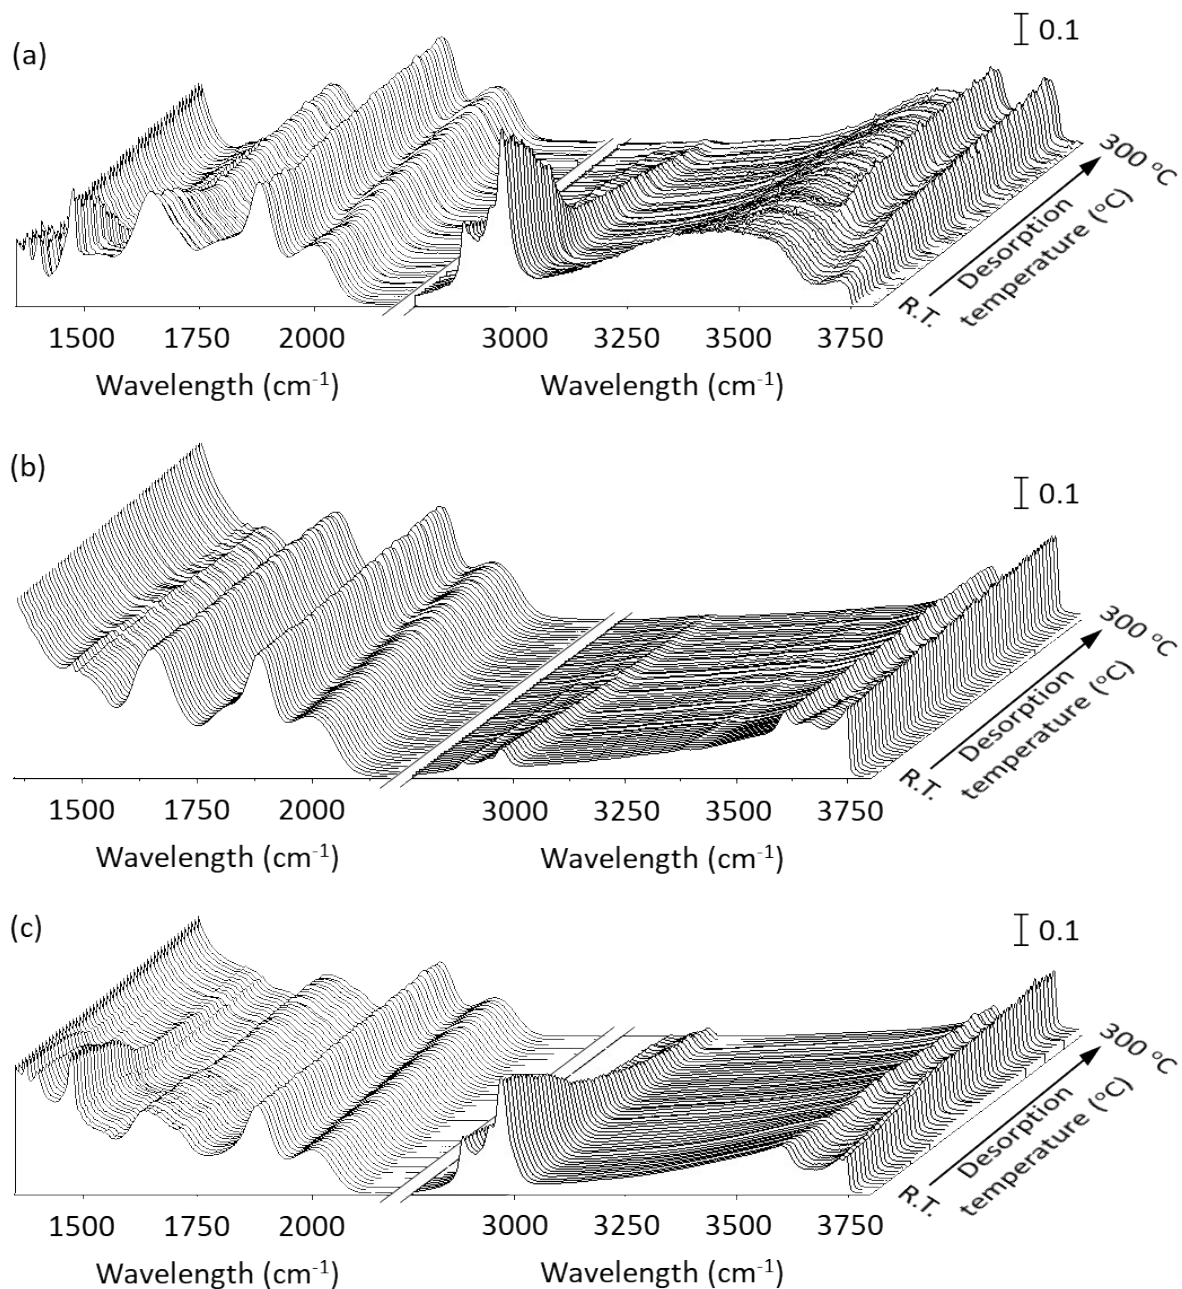

**Fig. S2** IR spectra of isobutanol adsorbed on (a) H-ZSM-5(50), (b) H-ferrierite(33) and (c) H-PST-24(47) at room temperature for 30 min and then desorbed under vacuum to a residual pressure of  $10^{-3}$  Torr at temperatures up to 300 °C with an interval of 5 °C and a holding time of 10 min at each temperature.
